# Supplementary material
Source: PubMed Central journal article supplement (PMC7201849)
Supplement: NIHMS1582934-supplement-1.pdf [file NIHMS1582934-supplement-1.pdf]

**Cell Reports, Volume 31**

**Supplemental Information**

**Visual Experience-Dependent Oscillations**

**and Underlying Circuit Connectivity**

**Changes Are Impaired in *Fmr1* KO Mice**

**Samuel T. Kissinger, Qiuyu Wu, Christopher J. Quinn, Adam K. Anderson, Alexandr Pak, and Alexander A. Chubykin**

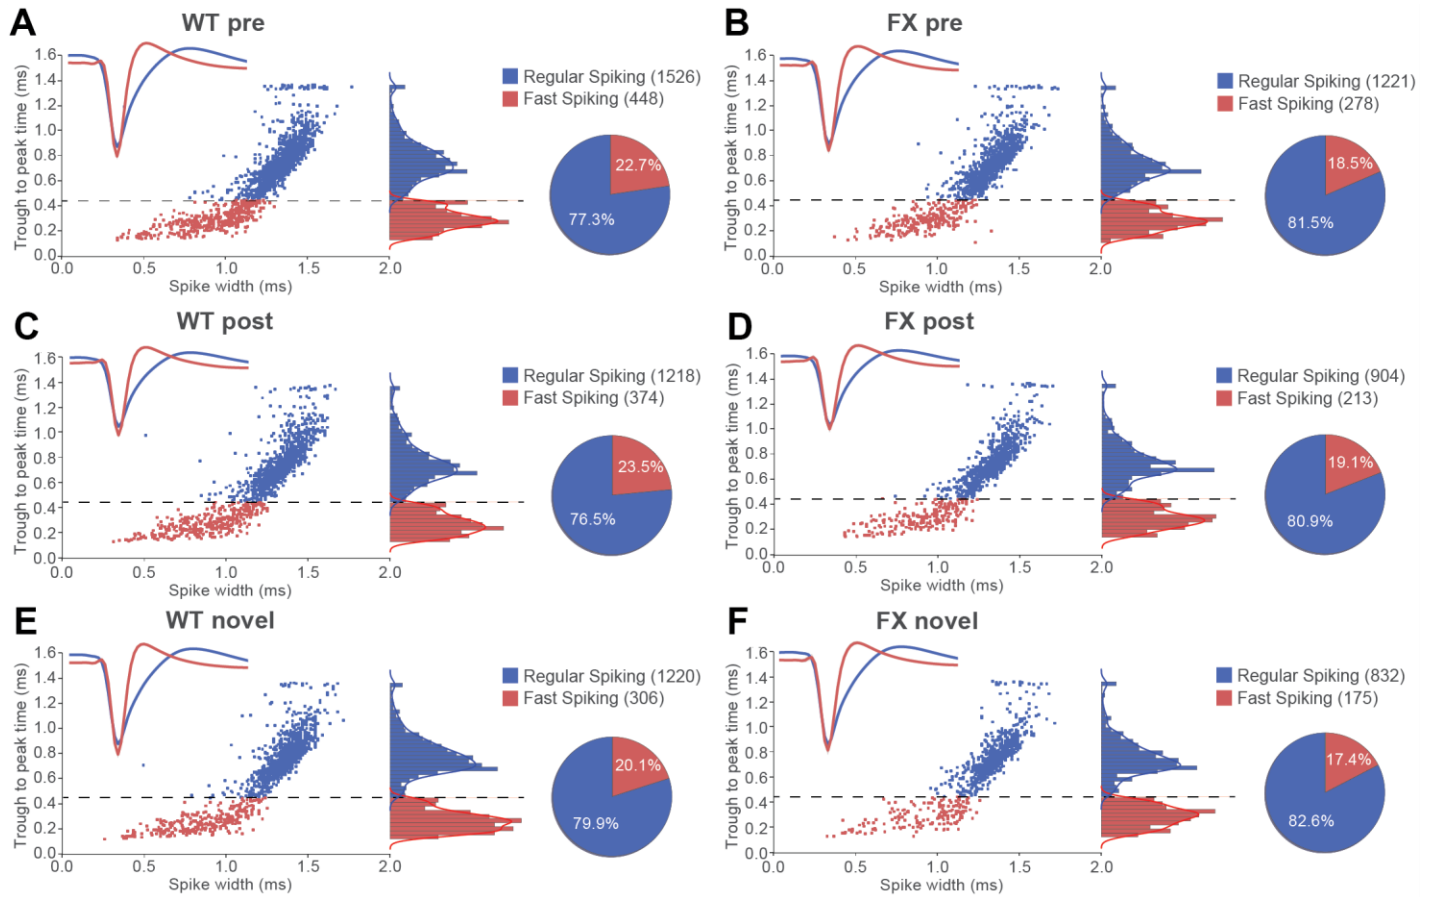

**Figure S1. Segregation of regular and fast spiking cells in WT and FX mice for each stimulus condition. Related to Figure 2.**

(A) Averaged waveforms, scatterplots and distributions of waveform trough to peak vs spike width times, and pie graphs of the percentage of each neural subtype recorded before the perceptual experience in WT animals. 448 units (22.7%) were FS, while 1526 (77.3%) were RS, across 33 mice.

(B) Units recorded in FX animals pre perceptual experience. FS: 278 (18.5%), RS: 1221 (81.5%) across 25 mice.

(C) Units recorded in WT animals post perceptual experience. FS: 374 (23.5%), RS: 1218 (76.5%) across 31 mice.

(D) Units recorded in FX animals post perceptual experience. FS: 213 (19.1%), RS: 904 (80.9%) across 25 mice.

(E) Units recorded in WT animals in response to novel stimuli. FS: 306 (20.1%), RS: 1220 (79.9%) across 24 mice.

(F) Units recorded in FX animals in response to novel stimuli. FS: 175 (17.4%), RS: 832 (82.6%) across 18 mice.

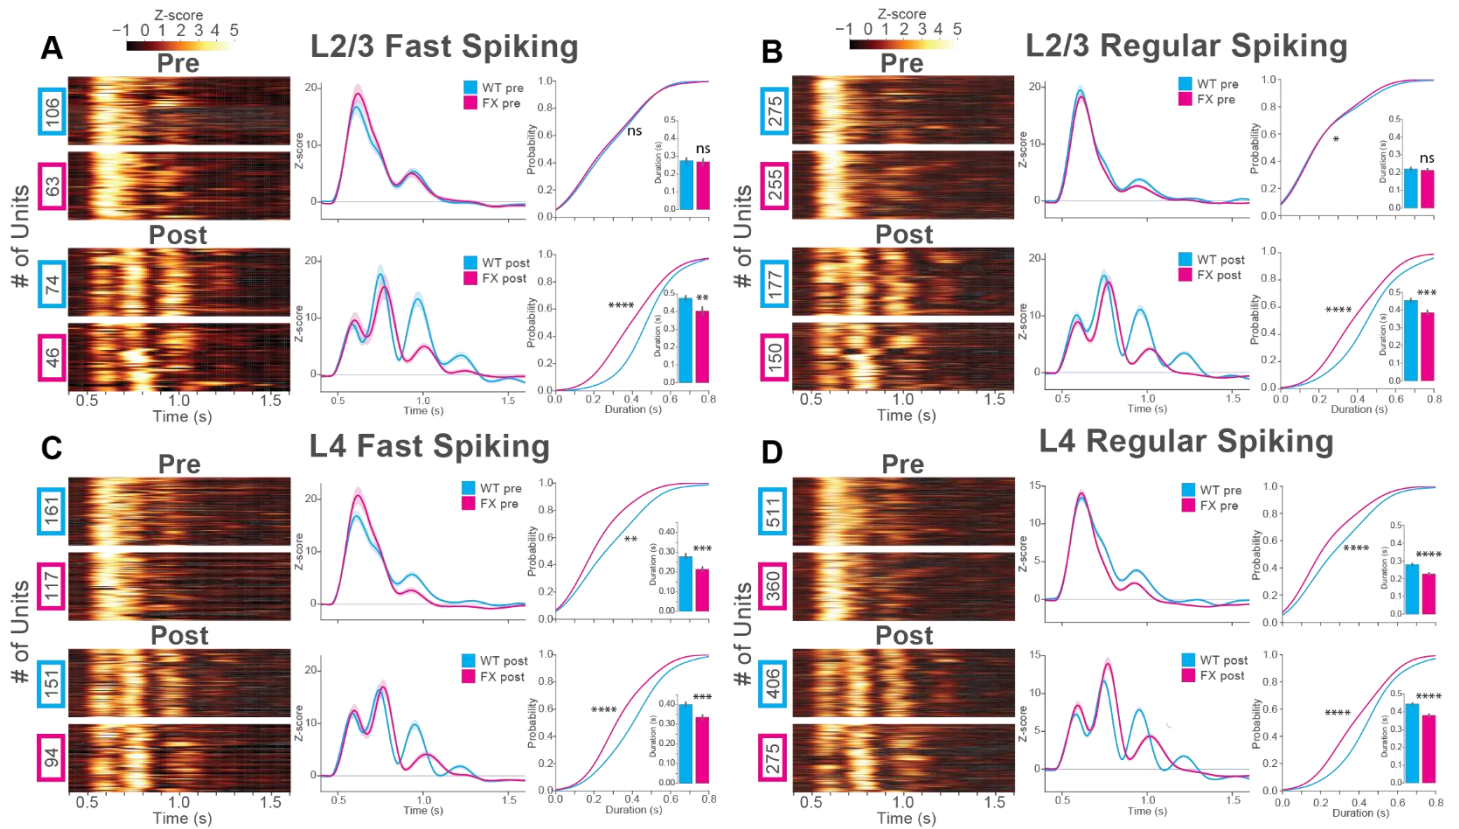

**Figure S2. Decreased oscillation duration of regular and fast spiking units in layers 2/3 and 4 of FX mice. Related to Figure 2.**

Visually excited units in L2/3 and L4 before and after perceptual experience to grating stimuli. WT (Cyan) 33 mice pre, 31 mice post. FX (magenta) 25 mice pre, 25 mice post. Z-scored firing rates are shown in the heatmaps. Population z-score line plots are shown to the right of the heatmaps. A cumulative distribution (CDF) of oscillation duration is shown to the right of the line plots, with bar graphs of the mean oscillation duration inset.

(A) L2/3 FS units: 2 sample KS test of duration CDFs, pre, WT vs FX duration:  $D(159)=0.08$ ,  $p=0.92$ . Welch's t-test of mean duration:  $t(159)=0.27$ ,  $p=0.78$  (units after peak detection: WT pre  $N=101$ , FX pre  $N=60$ ). 2 sample KS test of duration CDFs, post, WT vs FX duration:  $D(115)=0.41$ ,  $p=9.05E-9$ . Welch's unequal variances t-test of mean duration:  $t(115)=2.66$ ,  $p=9.33E-3$  (units after peak detection: WT post  $N=72$ , FX post  $N=45$ ). Error bars indicate SEM. \* $p<0.05$ , \*\* $p<0.01$ , \*\*\* $p<0.001$ , \*\*\*\* $p<0.0001$ .

(B) L2/3 RS units: 2 sample KS test of duration CDFs, pre, WT vs FX duration:  $D(501)=0.14$ ,  $p=0.01$ . Welch's t-test of mean duration:  $t(501)=0.45$ ,  $p=0.65$ . (units after peak detection: WT pre  $N=264$ , FX pre  $N=239$ ). 2 sample KS test of duration CDFs, post, WT vs FX duration:  $D(311)=0.35$ ,  $p=3.15E-9$ . Welch's unequal variances t-test of mean duration:  $t(311)=3.88$ ,  $p=1.2E-4$  (units after peak detection: WT post  $N=172$ , FX post  $N=139$ ).

(C) L4 FS units: 2 sample KS test of duration CDFs, pre, WT vs FX duration:  $D(267)=0.22$ ,  $p=1.89E-3$ . Welch's t-test of mean duration:  $t(267)=3.57$ ,  $p=4.17E-4$  (units after peak detection: WT pre  $N=154$ , FX pre  $N=115$ ). 2 sample KS test of duration CDFs, post, WT vs FX duration:  $D(234)=0.37$ ,  $p=1.16E-7$ . Welch's unequal variances t-test of mean duration:  $t(234)=3.84$ ,  $p=1.59E-4$  (units after peak detection: WT post  $N=145$ , FX post  $N=91$ ).

(D) L4 RS units: 2 sample KS test of duration CDFs, pre, WT vs FX duration:  $D(825)=0.17$ ,  $p=8.20E-6$  (units after peak detection: WT pre  $N=460$ , FX pre  $N=367$ ). Welch's unequal variances t-test of mean duration:  $t(825)=4.85$ ,  $p=1.42E-6$ . (2 sample KS test of duration CDFs, post, WT vs FX duration:  $D(714)=0.35$ ,  $p=5.32E-17$ . Welch's t-test of mean duration:  $t(714)=5.53$ ,  $p=4.87E-8$  (units after peak detection: WT post  $N=408$ , FX post  $N=308$ ).

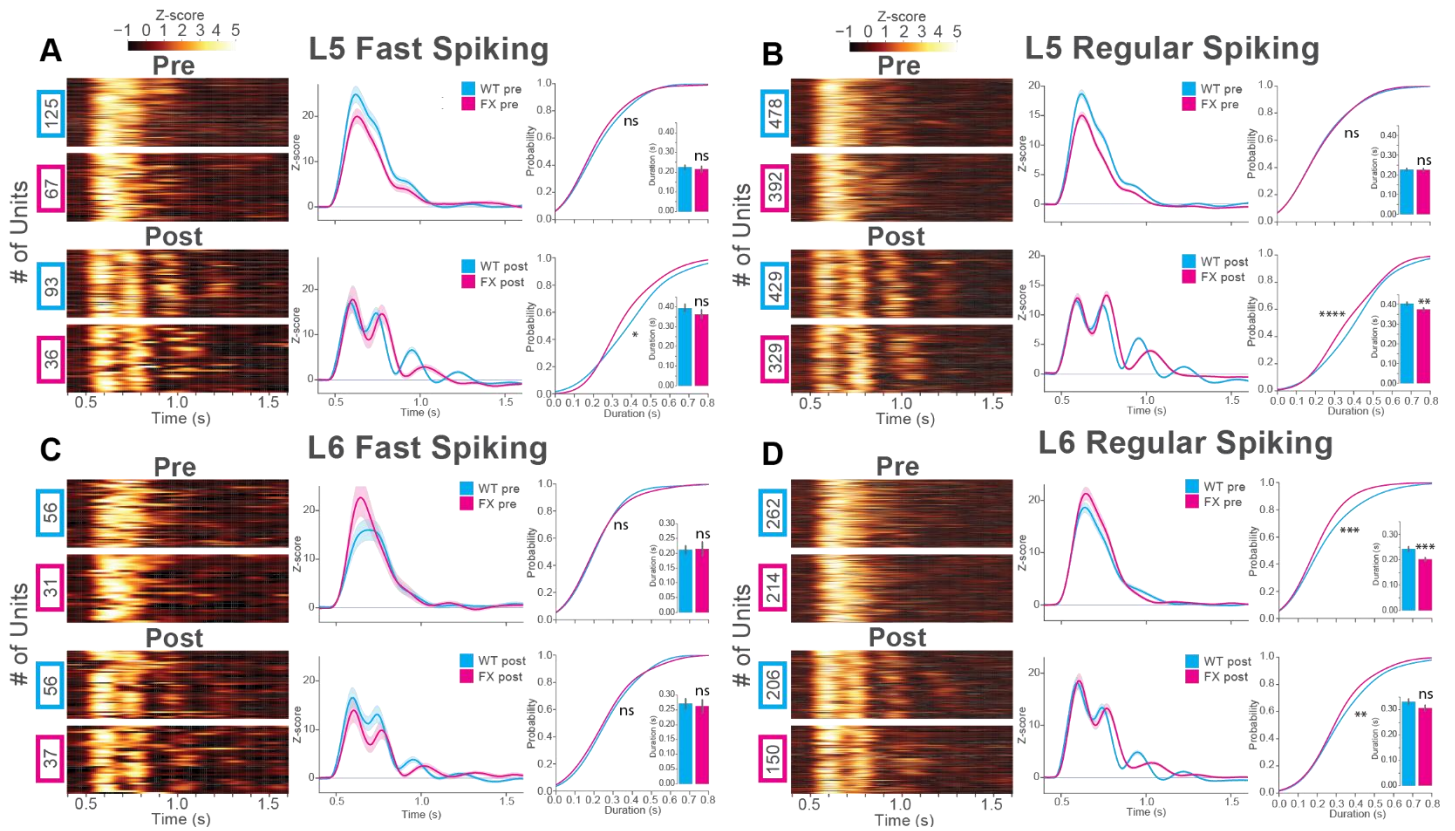

**Figure S3. Decreased oscillation duration of regular and fast spiking units in layer 5 and regular spiking units in layer 6 of FX mice after perceptual experience. Related to Figure 2.**

Visually excited units in L5 and L6 before and after perceptual experience to grating stimuli. WT (Cyan) 33 mice pre, 31 mice post. FX (magenta) 25 mice pre, 25 mice post. Z-scored firing rates are shown in the heatmaps. Population z-score line plots are shown to the right of the heatmaps. A cumulative distribution (CDF) of oscillation duration is shown to the right of the line plots, with bar graphs of the mean oscillation duration inset.

(A) L5 FS units: 2 sample KS test of duration CDFs, pre, WT vs FX duration:  $D(190)=0.10$ ,  $p=0.71$ . Welch's t-test of mean duration:  $t(190)=0.49$ ,  $p=0.62$  (units after peak detection: WT pre  $N=124$ , FX pre  $N=66$ ). 2 sample KS test of duration CDFs, post, WT vs FX duration:  $D(124)=0.27$ ,  $p=0.03$ . Welch's unequal variances t-test of mean duration:  $t(124)=-1.03$ ,  $p=0.30$  (units after peak detection: WT post  $N=91$ , FX post  $N=35$ ). Error bars indicate SEM. \* $p<0.05$ , \*\* $p<0.01$ , \*\*\* $p<0.001$ , \*\*\*\* $p<0.0001$ .

(B) L5 RS units: 2 sample KS test of duration CDFs, pre, WT vs FX duration:  $D(825)=0.04$ ,  $p=0.83$ . Welch's t-test of mean duration:  $t(825)=0.12$ ,  $p=0.90$  (units after peak detection: WT pre  $N=460$ , FX pre  $N=367$ ). 2 sample KS test of duration CDFs, post, WT vs FX duration:  $D(714)=0.23$ ,  $p=4.74E-9$ . Welch's unequal variances t-test of mean duration:  $t(714)=2.61$ ,  $p=9.19E-3$  (units after peak detection: WT post  $N=408$ , FX post  $N=308$ ).

(C) L6 FS units: 2 sample KS test of duration CDFs, pre, WT vs FX duration:  $D(83)=0.13$ ,  $p=0.85$ . Welch's t-test of mean duration:  $t(83)=-0.11$ ,  $p=0.91$  (units after peak detection: WT pre  $N=55$ , FX pre  $N=30$ ). 2 sample KS test of duration CDFs, post, WT vs FX duration:  $D(90)=0.24$ ,  $p=0.10$ . Welch's unequal variances t-test of mean duration:  $t(90)=0.29$ ,  $p=0.76$  (units after peak detection: WT post  $N=55$ , FX post  $N=37$ ).

(D) L6 RS units: 2 sample KS test of duration CDFs, pre, WT vs FX duration:  $D(255)=0.15$ ,  $p=6.94E-3$ . Welch's t-test of mean duration:  $t(255)=3.40$ ,  $p=7.13E-4$  (units after peak detection: WT pre  $N=250$ , FX pre  $N=207$ ). 2 sample KS test of duration CDFs, post, WT vs FX duration:  $D(337)=0.20$ ,  $p=2.13E-3$ . Welch's unequal variances t-test of mean duration:  $t(337)=1.59$ ,  $p=0.11$  (units after peak detection: WT post  $N=197$ , FX post  $N=142$ ).

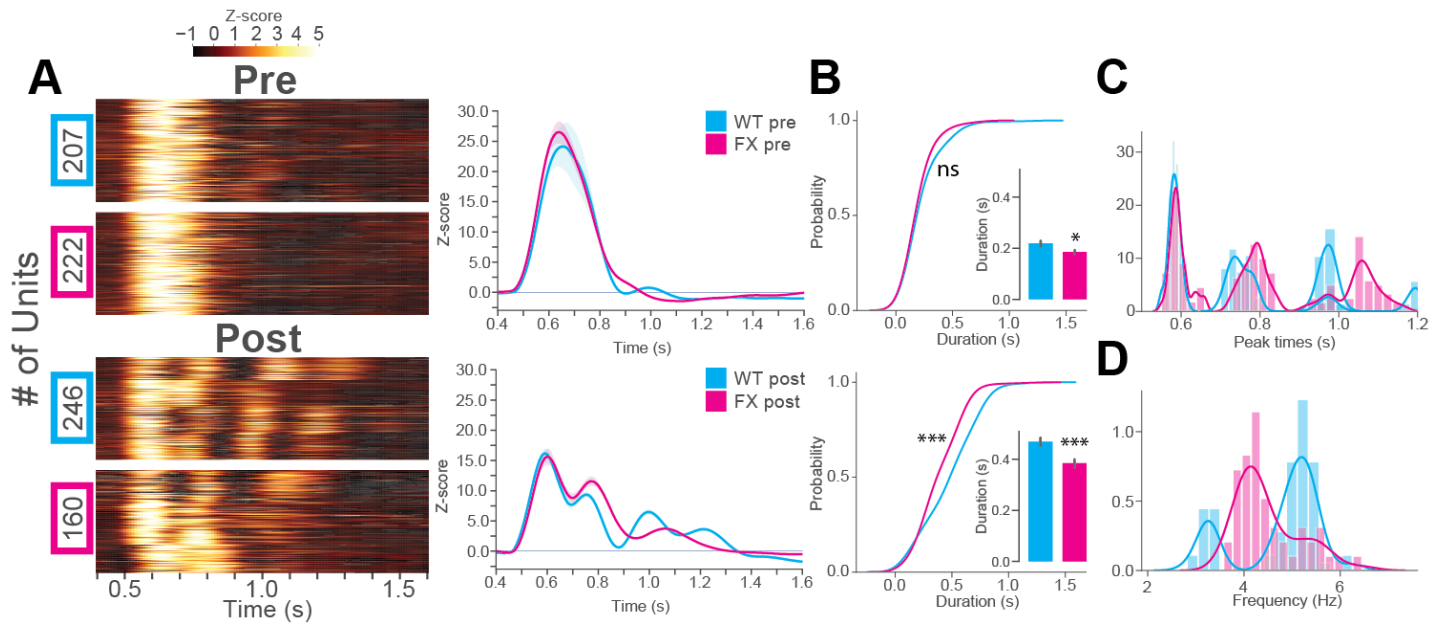

**Figure S4. Decreased oscillation durations after perceptual experience in homozygous female FX mice. Related to Figure 2.**

(A) Visually excited units across all layers before or after perceptual experience to grating stimuli. WT (Cyan) 4 mice pre, 4 mice post. FX (magenta) 4 mice pre, 4 mice post. Z-scored firing rates are shown in the heatmaps. Population z-score line plots are shown to the right of the heatmaps.

(B) Cumulative distributions (CDF) of oscillation duration, with bar graphs of the mean oscillation duration inset. 2 sample KS test of duration CDFs, pre, WT vs FX duration:  $D(427)=0.11$ ,  $p=0.10$ . Welch's t-test of mean duration:  $t(427)=2.46$ ,  $p=1.42E-2$  (units after peak detection: WT pre  $N=195$ , FX pre  $N=216$ ). 2 sample KS test of duration CDFs, post, WT vs FX duration:  $D(404)=0.28$ ,  $p=6.39E-7$ . Welch's unequal variances t-test of mean duration:  $t(404)=3.76$ ,  $p=1.96E-4$  (units after peak detection: WT post  $N=225$ , FX post  $N=144$ ). Error bars indicate SEM. \* $p<0.05$ , \*\* $p<0.01$ , \*\*\* $p<0.001$ .

(C) Distributions of peak times across WT and FX unit populations at 3 oscillation cycles for the units in A and B.

(D) Distributions of oscillation frequency for the units in A and B.

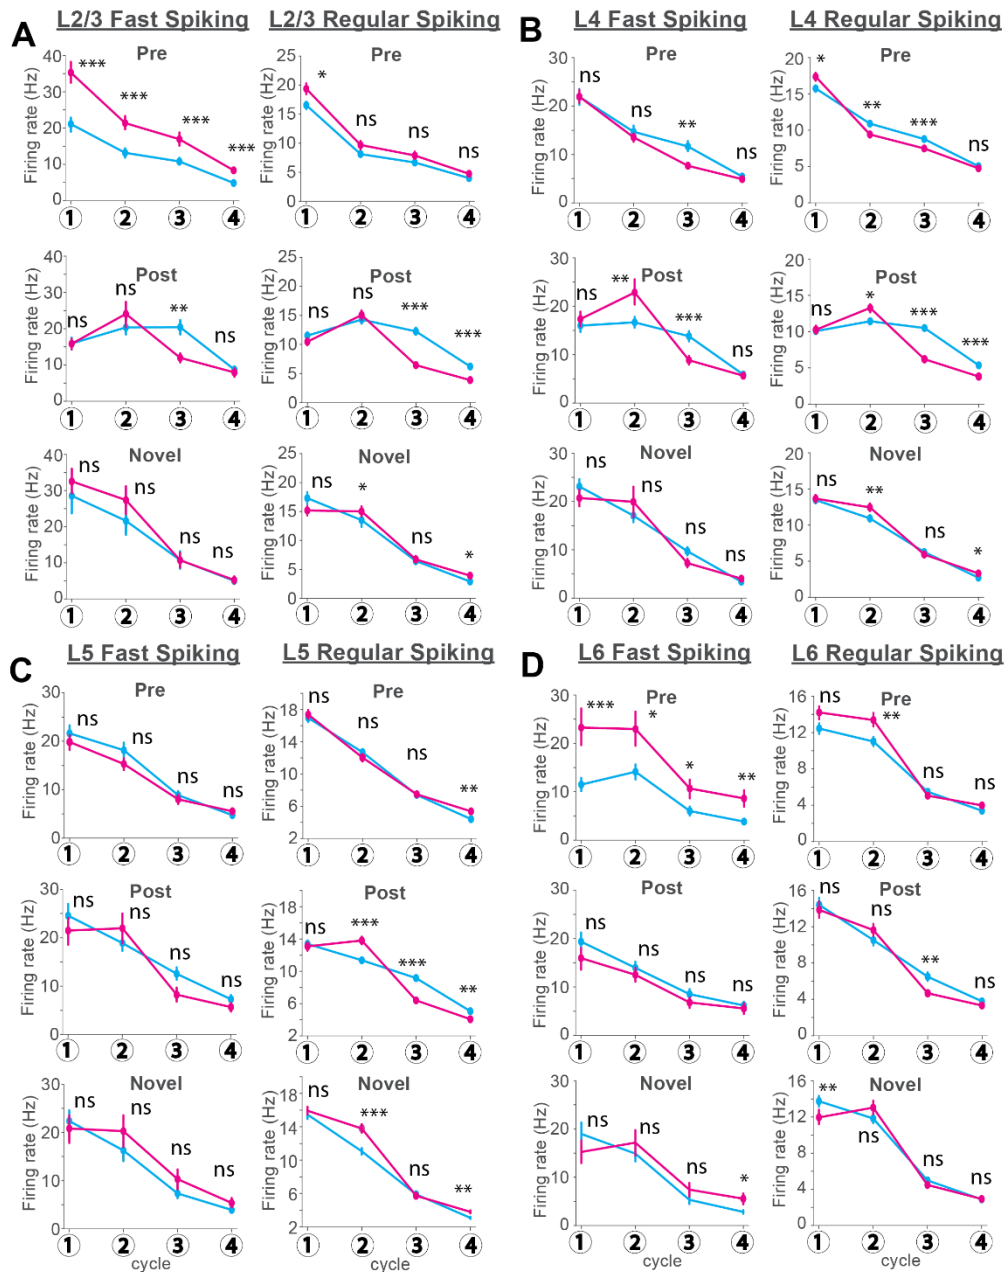

**Figure S5. Mean firing rates at each oscillation cycle in WT and FX mice. Related to Figure 2.**

(A) Firing rates for L2/3 RS and FS cells at each oscillation cycle and stimulus condition. The units used for this analysis are found in figure S2A and B. See table S1 for statistical analysis. Error bars indicate SEM. \* $p < 0.05$ , \*\* $p < 0.01$ , \*\*\* $p < 0.001$ .

(B) Firing rates for L4 RS and FS cells at each oscillation cycle and stimulus condition. The units used for this analysis are found in figure S2C and D. See table S1 for statistical analysis.

(C) Firing rates for L5 RS and FS cells at each oscillation cycle and stimulus condition. The units used for this analysis are found in figure S3A and B. See table S1 for statistical analysis.

(D) Firing rates for L6 RS and FS cells at each oscillation cycle and stimulus condition. The units used for this analysis are found in figure S3C and D. See table S1 for statistical analysis.

| <b>Table S1. Mean firing rates at each oscillation cycle, WT vs FX. Related to Figure 2</b> |                 |                       |           |               |          |
|---------------------------------------------------------------------------------------------|-----------------|-----------------------|-----------|---------------|----------|
| <b>Comparison</b>                                                                           | <b>Estimate</b> | <b>Standard Error</b> | <b>DF</b> | <b>t or F</b> | <b>p</b> |
| <b>Pre L2/3 FS</b>                                                                          |                 |                       |           |               |          |
| Fixed Effect: Genotype                                                                      | N/A             | N/A                   | 167       | 22.56         | <.0004   |
| Fixed Effect: Oscillation number                                                            | N/A             | N/A                   | 501       | 242.13        | <.0004   |
| Fixed Effect: Group * Oscillation                                                           | N/A             | N/A                   | 501       | 3.27          | 0.021    |
| Pre L2/3 FS Cycle 1                                                                         | 0.8283          | 0.1502                | 277.4     | 5.52          | <.0004   |
| Pre L2/3 FS Cycle 2                                                                         | 0.6506          | 0.1502                | 277.4     | 4.33          | <.0004   |
| Pre L2/3 FS Cycle 3                                                                         | 0.503           | 0.1502                | 277.4     | 3.35          | 0.0009   |
| Pre L2/3 FS Cycle 4                                                                         | 0.5119          | 0.1502                | 277.4     | 3.41          | 0.0007   |
| <b>Pre L2/3 RS</b>                                                                          |                 |                       |           |               |          |
| Fixed Effect: Genotype                                                                      | N/A             | N/A                   | 528       | 3.49          | 0.0625   |
| Fixed Effect: Oscillation number                                                            | N/A             | N/A                   | 1584      | 836.97        | <.0004   |
| Fixed Effect: Group * Oscillation                                                           | N/A             | N/A                   | 1584      | 0.88          | 0.452    |
| Pre L2/3 RS Cycle 1                                                                         | 0.1607          | 0.07027               | 929.9     | 2.29          | 0.0224   |
| Pre L2/3 RS Cycle 2                                                                         | 0.1049          | 0.07027               | 929.9     | 1.49          | 0.1357   |
| Pre L2/3 RS Cycle 3                                                                         | 0.06649         | 0.07027               | 929.9     | 0.95          | 0.3443   |
| Pre L2/3 RS Cycle 4                                                                         | 0.1188          | 0.07027               | 929.9     | 1.69          | 0.0914   |
| <b>Pre L4 FS</b>                                                                            |                 |                       |           |               |          |
| Fixed Effect: Genotype                                                                      | N/A             | N/A                   | 276       | 0.02          | 0.8807   |
| Fixed Effect: Oscillation number                                                            | N/A             | N/A                   | 828       | 407.7         | <.0004   |
| Fixed Effect: Group * Oscillation                                                           | N/A             | N/A                   | 828       | 9.97          | <.0004   |
| Pre L4 FS Cycle 1                                                                           | 0.1218          | 0.1103                | 451       | 1.1           | 0.2698   |
| Pre L4 FS Cycle 2                                                                           | 0.103           | 0.1103                | 451       | 0.93          | 0.3508   |
| Pre L4 FS Cycle 3                                                                           | -0.2939         | 0.1103                | 451       | -2.66         | 0.008    |
| Pre L4 FS Cycle 4                                                                           | 0.01084         | 0.1103                | 451       | 0.1           | 0.9217   |
| <b>Pre L4 RS</b>                                                                            |                 |                       |           |               |          |
| Fixed Effect: Genotype                                                                      | N/A             | N/A                   | 869       | 2.13          | 0.1452   |
| Fixed Effect: Oscillation number                                                            | N/A             | N/A                   | 2607      | 1283.71       | <.0004   |
| Fixed Effect: Group * Oscillation                                                           | N/A             | N/A                   | 2607      | 23.6          | <.0004   |
| Pre L4 RS Cycle 1                                                                           | 0.12            | 0.04944               | 1444      | 2.43          | 0.0153   |
| Pre L4 RS Cycle 2                                                                           | -0.1607         | 0.04944               | 1444      | -3.25         | 0.0012   |
| Pre L4 RS Cycle 3                                                                           | -0.1684         | 0.04944               | 1444      | -3.41         | 0.0007   |
| Pre L4 RS Cycle 4                                                                           | -0.04283        | 0.04944               | 1444      | -0.87         | 0.3864   |
| <b>Pre L5 FS</b>                                                                            |                 |                       |           |               |          |
| Fixed Effect: Genotype                                                                      | N/A             | N/A                   | 190       | 0.01          | 0.9302   |
| Fixed Effect: Oscillation number                                                            | N/A             | N/A                   | 570       | 267.36        | <.0004   |
| Fixed Effect: Group * Oscillation                                                           | N/A             | N/A                   | 570       | 2.51          | 0.058    |
| Pre L5 FS Cycle 1                                                                           | -0.03074        | 0.1344                | 344.2     | -0.23         | 0.8192   |
| Pre L5 FS Cycle 2                                                                           | -0.1065         | 0.1344                | 344.2     | -0.79         | 0.4287   |
| Pre L5 FS Cycle 3                                                                           | -0.0801         | 0.1344                | 344.2     | -0.6          | 0.5515   |
| Pre L5 FS Cycle 4                                                                           | 0.1771          | 0.1344                | 344.2     | 1.32          | 0.1883   |
| <b>Pre L5 RS</b>                                                                            |                 |                       |           |               |          |
| Fixed Effect: Genotype                                                                      | N/A             | N/A                   | 868       | 0.4           | 0.5255   |
| Fixed Effect: Oscillation number                                                            | N/A             | N/A                   | 2604      | 1230.74       | <.0004   |
| Fixed Effect: Group * Oscillation                                                           | N/A             | N/A                   | 2604      | 7.19          | <.0004   |
| Pre L5 RS Cycle 1                                                                           | 0.01396         | 0.05165               | 1622      | 0.27          | 0.7869   |
| Pre L5 RS Cycle 2                                                                           | -0.06625        | 0.05165               | 1622      | -1.28         | 0.1998   |
| Pre L5 RS Cycle 3                                                                           | 0.02132         | 0.05165               | 1622      | 0.41          | 0.6799   |
| Pre L5 RS Cycle 4                                                                           | 0.1417          | 0.05165               | 1622      | 2.74          | 0.0061   |
| <b>Pre L6 FS</b>                                                                            |                 |                       |           |               |          |
| Fixed Effect: Genotype                                                                      | N/A             | N/A                   | 85        | 10.96         | 0.0014   |
| Fixed Effect: Oscillation number                                                            | N/A             | N/A                   | 255       | 95.91         | <.0004   |
| Fixed Effect: Group * Oscillation                                                           | N/A             | N/A                   | 255       | 1.74          | 0.1596   |
| Pre L6 FS Cycle 1                                                                           | 0.8063          | 0.2064                | 136.5     | 3.91          | 0.0001   |
| Pre L6 FS Cycle 2                                                                           | 0.5297          | 0.2064                | 136.5     | 2.57          | 0.0114   |
| Pre L6 FS Cycle 3                                                                           | 0.4658          | 0.2064                | 136.5     | 2.26          | 0.0256   |
| Pre L6 FS Cycle 4                                                                           | 0.6101          | 0.2064                | 136.5     | 2.96          | 0.0037   |
| <b>Pre L6 RS</b>                                                                            |                 |                       |           |               |          |
| Fixed Effect: Genotype                                                                      | N/A             | N/A                   | 474       | 2.5           | 0.1147   |
| Fixed Effect: Oscillation number                                                            | N/A             | N/A                   | 1422      | 670.39        | <.0004   |
| Fixed Effect: Group * Oscillation                                                           | N/A             | N/A                   | 1422      | 6.81          | 0.0004   |
| Pre L6 RS Cycle 1                                                                           | 0.1289          | 0.06601               | 947.8     | 1.95          | 0.0511   |
| Pre L6 RS Cycle 2                                                                           | 0.1814          | 0.06601               | 947.8     | 2.75          | 0.0061   |
| Pre L6 RS Cycle 3                                                                           | -0.07556        | 0.06601               | 947.8     | -1.14         | 0.2526   |
| Pre L6 RS Cycle 4                                                                           | 0.1101          | 0.06601               | 947.8     | 1.67          | 0.0957   |

| <b>Post L2/3 FS</b>               |          |         |       |        |        |
|-----------------------------------|----------|---------|-------|--------|--------|
| Fixed Effect: Genotype            | N/A      | N/A     | 118   | 0.33   | 0.5651 |
| Fixed Effect: Oscillation number  | N/A      | N/A     | 354   | 86.79  | <.0004 |
| Fixed Effect: Group * Oscillation | N/A      | N/A     | 354   | 11.3   | <.0004 |
| Post L2/3 FS Cycle 1              | 0.1053   | 0.1738  | 198.3 | 0.61   | 0.5454 |
| Post L2/3 FS Cycle 2              | 0.1646   | 0.1738  | 198.3 | 0.95   | 0.345  |
| Post L2/3 FS Cycle 3              | -0.5649  | 0.1738  | 198.3 | -3.25  | 0.0014 |
| Post L2/3 FS Cycle 4              | -0.05445 | 0.1738  | 198.3 | -0.31  | 0.7545 |
| <b>Post L2/3 RS</b>               |          |         |       |        |        |
| Fixed Effect: Genotype            | N/A      | N/A     | 325   | 16.35  | <.0004 |
| Fixed Effect: Oscillation number  | N/A      | N/A     | 975   | 300.33 | <.0004 |
| Fixed Effect: Group * Oscillation | N/A      | N/A     | 975   | 36.09  | <.0004 |
| Post L2/3 RS Cycle 1              | -0.0958  | 0.07581 | 667.5 | -1.26  | 0.2068 |
| Post L2/3 RS Cycle 2              | 0.05196  | 0.07581 | 667.5 | 0.69   | 0.4934 |
| Post L2/3 RS Cycle 3              | -0.6408  | 0.07581 | 667.5 | -8.45  | <.0004 |
| Post L2/3 RS Cycle 4              | -0.3201  | 0.07581 | 667.5 | -4.22  | <.0004 |
| <b>Post L4 FS</b>                 |          |         |       |        |        |
| Fixed Effect: Genotype            | N/A      | N/A     | 243   | 0.05   | 0.8206 |
| Fixed Effect: Oscillation number  | N/A      | N/A     | 729   | 237.28 | <.0004 |
| Fixed Effect: Group * Oscillation | N/A      | N/A     | 729   | 21.81  | <.0004 |
| Post L4 FS Cycle 1                | 0.1206   | 0.1204  | 424.9 | 1      | 0.317  |
| Post L4 FS Cycle 2                | 0.3614   | 0.1204  | 424.9 | 3      | 0.0028 |
| Post L4 FS Cycle 3                | -0.4271  | 0.1204  | 424.9 | -3.55  | 0.0004 |
| Post L4 FS Cycle 4                | 0.03915  | 0.1204  | 424.9 | 0.33   | 0.7451 |
| <b>Post L4 RS</b>                 |          |         |       |        |        |
| Fixed Effect: Genotype            | N/A      | N/A     | 679   | 12.79  | 0.0004 |
| Fixed Effect: Oscillation number  | N/A      | N/A     | 2037  | 510.45 | <.0004 |
| Fixed Effect: Group * Oscillation | N/A      | N/A     | 2037  | 65.31  | <.0004 |
| Post L4 RS Cycle 1                | -0.01959 | 0.05341 | 1321  | -0.37  | 0.7139 |
| Post L4 RS Cycle 2                | 0.1334   | 0.05341 | 1321  | 2.5    | 0.0126 |
| Post L4 RS Cycle 3                | -0.4951  | 0.05341 | 1321  | -9.27  | <.0004 |
| Post L4 RS Cycle 4                | -0.2558  | 0.05341 | 1321  | -4.79  | <.0004 |
| <b>Post L5 FS</b>                 |          |         |       |        |        |
| Fixed Effect: Genotype            | N/A      | N/A     | 127   | 0.3    | 0.5836 |
| Fixed Effect: Oscillation number  | N/A      | N/A     | 381   | 119.65 | <.0004 |
| Fixed Effect: Group * Oscillation | N/A      | N/A     | 381   | 4.34   | 0.0051 |
| Post L5 FS Cycle 1                | -0.06021 | 0.2048  | 215.4 | -0.29  | 0.7691 |
| Post L5 FS Cycle 2                | 0.1995   | 0.2048  | 215.4 | 0.97   | 0.3312 |
| Post L5 FS Cycle 3                | -0.3931  | 0.2048  | 215.4 | -1.92  | 0.0563 |
| Post L5 FS Cycle 4                | -0.1374  | 0.2048  | 215.4 | -0.67  | 0.5031 |
| <b>Post L5 RS</b>                 |          |         |       |        |        |
| Fixed Effect: Genotype            | N/A      | N/A     | 756   | 3.95   | 0.0472 |
| Fixed Effect: Oscillation number  | N/A      | N/A     | 2268  | 821.28 | <.0004 |
| Fixed Effect: Group * Oscillation | N/A      | N/A     | 2268  | 53.89  | <.0004 |
| Post L5 RS Cycle 1                | -0.0331  | 0.04897 | 1515  | -0.68  | 0.4993 |
| Post L5 RS Cycle 2                | 0.2123   | 0.04897 | 1515  | 4.33   | <.0004 |
| Post L5 RS Cycle 3                | -0.3468  | 0.04897 | 1515  | -7.08  | <.0004 |
| Post L5 RS Cycle 4                | -0.1541  | 0.04897 | 1515  | -3.15  | 0.0017 |
| <b>Post L6 FS</b>                 |          |         |       |        |        |
| Fixed Effect: Genotype            | N/A      | N/A     | 91    | 2.11   | 0.1502 |
| Fixed Effect: Oscillation number  | N/A      | N/A     | 273   | 100.09 | <.0004 |
| Fixed Effect: Group * Oscillation | N/A      | N/A     | 273   | 0.37   | 0.7744 |
| Post L6 FS Cycle 1                | -0.2772  | 0.1718  | 161.1 | -1.61  | 0.1086 |
| Post L6 FS Cycle 2                | -0.1757  | 0.1718  | 161.1 | -1.02  | 0.308  |
| Post L6 FS Cycle 3                | -0.255   | 0.1718  | 161.1 | -1.48  | 0.1398 |
| Post L6 FS Cycle 4                | -0.1476  | 0.1718  | 161.1 | -0.86  | 0.3915 |
| <b>Post L6 RS</b>                 |          |         |       |        |        |
| Fixed Effect: Genotype            | N/A      | N/A     | 354   | 1      | 0.3188 |
| Fixed Effect: Oscillation number  | N/A      | N/A     | 1062  | 554.12 | <.0004 |
| Fixed Effect: Group * Oscillation | N/A      | N/A     | 1062  | 6.66   | 0.0002 |
| Post L6 RS Cycle 1                | -0.07444 | 0.07315 | 691.9 | -1.02  | 0.3092 |
| Post L6 RS Cycle 2                | 0.08321  | 0.07315 | 691.9 | 1.14   | 0.2557 |
| Post L6 RS Cycle 3                | -0.2106  | 0.07315 | 691.9 | -2.88  | 0.0041 |
| Post L6 RS Cycle 4                | -0.04135 | 0.07315 | 691.9 | -0.57  | 0.572  |
| <b>Novel L2/3 FS</b>              |          |         |       |        |        |
| Fixed Effect: Genotype            | N/A      | N/A     | 48    | 0.97   | 0.3284 |
| Fixed Effect: Oscillation number  | N/A      | N/A     | 144   | 94.36  | <.0004 |
| Fixed Effect: Group * Oscillation | N/A      | N/A     | 144   | 1.63   | 0.1853 |



|                                   |          |         |       |         |        |
|-----------------------------------|----------|---------|-------|---------|--------|
| Novel L2/3 FS Cycle 1             | 0.4536   | 0.3105  | 87.27 | 1.46    | 0.1476 |
| Novel L2/3 FS Cycle 2             | 0.4836   | 0.3105  | 87.27 | 1.56    | 0.123  |
| Novel L2/3 FS Cycle 3             | 0.06215  | 0.3105  | 87.27 | 0.2     | 0.8418 |
| Novel L2/3 FS Cycle 4             | 0.0443   | 0.3105  | 87.27 | 0.14    | 0.8869 |
| <b>Novel L2/3 RS</b>              |          |         |       |         |        |
| Fixed Effect: Genotype            | N/A      | N/A     | 211   | 1.78    | 0.1842 |
| Fixed Effect: Oscillation number  | N/A      | N/A     | 633   | 427.35  | <.0004 |
| Fixed Effect: Group * Oscillation | N/A      | N/A     | 633   | 5.53    | 0.0009 |
| Novel L2/3 RS Cycle 1             | -0.09733 | 0.1018  | 435.5 | -0.96   | 0.3395 |
| Novel L2/3 RS Cycle 2             | 0.2024   | 0.1018  | 435.5 | 1.99    | 0.0475 |
| Novel L2/3 RS Cycle 3             | 0.07667  | 0.1018  | 435.5 | 0.75    | 0.4518 |
| Novel L2/3 RS Cycle 4             | 0.2622   | 0.1018  | 435.5 | 2.58    | 0.0103 |
| <b>Novel L4 FS</b>                |          |         |       |         |        |
| Fixed Effect: Genotype            | N/A      | N/A     | 214   | 0.33    | 0.5674 |
| Fixed Effect: Oscillation number  | N/A      | N/A     | 642   | 364.85  | <.0004 |
| Fixed Effect: Group * Oscillation | N/A      | N/A     | 642   | 4.5     | 0.0039 |
| Novel L4 FS Cycle 1               | -0.162   | 0.1317  | 386.7 | -1.23   | 0.2195 |
| Novel L4 FS Cycle 2               | 0.03545  | 0.1317  | 386.7 | 0.27    | 0.788  |
| Novel L4 FS Cycle 3               | -0.2468  | 0.1317  | 386.7 | -1.87   | 0.0618 |
| Novel L4 FS Cycle 4               | 0.116    | 0.1317  | 386.7 | 0.88    | 0.3792 |
| <b>Novel L4 RS</b>                |          |         |       |         |        |
| Fixed Effect: Genotype            | N/A      | N/A     | 613   | 1.82    | 0.1774 |
| Fixed Effect: Oscillation number  | N/A      | N/A     | 1839  | 1185.15 | <.0001 |
| Fixed Effect: Group * Oscillation | N/A      | N/A     | 1839  | 6.3     | 0.0003 |
| Novel L4 RS Cycle 1               | 0.01919  | 0.05428 | 1189  | 0.35    | 0.7237 |
| Novel L4 RS Cycle 2               | 0.1449   | 0.05428 | 1189  | 2.67    | 0.0077 |
| Novel L4 RS Cycle 3               | -0.04013 | 0.05428 | 1189  | -0.74   | 0.4599 |
| Novel L4 RS Cycle 4               | 0.1207   | 0.05428 | 1189  | 2.22    | 0.0264 |
| <b>Novel L5 FS</b>                |          |         |       |         |        |
| Fixed Effect: Genotype            | N/A      | N/A     | 130   | 1.39    | 0.241  |
| Fixed Effect: Oscillation number  | N/A      | N/A     | 390   | 186.5   | <.0001 |
| Fixed Effect: Group * Oscillation | N/A      | N/A     | 390   | 3.73    | 0.0115 |
| Novel L5 FS Cycle 1               | -0.08649 | 0.1845  | 208.6 | -0.47   | 0.6397 |
| Novel L5 FS Cycle 2               | 0.3493   | 0.1845  | 208.6 | 1.89    | 0.0597 |
| Novel L5 FS Cycle 3               | 0.2886   | 0.1845  | 208.6 | 1.56    | 0.1193 |
| Novel L5 FS Cycle 4               | 0.2158   | 0.1845  | 208.6 | 1.17    | 0.2435 |
| <b>Novel L5 RS</b>                |          |         |       |         |        |
| Fixed Effect: Genotype            | N/A      | N/A     | 793   | 7.93    | 0.005  |
| Fixed Effect: Oscillation number  | N/A      | N/A     | 2379  | 1605.3  | <.0001 |
| Fixed Effect: Group * Oscillation | N/A      | N/A     | 2379  | 11.82   | <.0001 |
| Novel L5 RS Cycle 1               | 0.07126  | 0.04965 | 1557  | 1.44    | 0.1514 |
| Novel L5 RS Cycle 2               | 0.2546   | 0.04965 | 1557  | 5.13    | <.0001 |
| Novel L5 RS Cycle 3               | -0.00285 | 0.04965 | 1557  | -0.06   | 0.9543 |
| Novel L5 RS Cycle 4               | 0.142    | 0.04965 | 1557  | 2.86    | 0.0043 |
| <b>Novel L6 FS</b>                |          |         |       |         |        |
| Fixed Effect: Genotype            | N/A      | N/A     | 81    | 1.05    | 0.3093 |
| Fixed Effect: Oscillation number  | N/A      | N/A     | 243   | 113.52  | <.0001 |
| Fixed Effect: Group * Oscillation | N/A      | N/A     | 243   | 5.16    | 0.0018 |
| Novel L6 FS Cycle 1               | -0.2047  | 0.2079  | 144.7 | -0.98   | 0.3265 |
| Novel L6 FS Cycle 2               | 0.1858   | 0.2079  | 144.7 | 0.89    | 0.3729 |
| Novel L6 FS Cycle 3               | 0.2834   | 0.2079  | 144.7 | 1.36    | 0.1748 |
| Novel L6 FS Cycle 4               | 0.4632   | 0.2079  | 144.7 | 2.23    | 0.0274 |
| <b>Novel L6 RS</b>                |          |         |       |         |        |
| Fixed Effect: Genotype            | N/A      | N/A     | 427   | 0.22    | 0.6427 |
| Fixed Effect: Oscillation number  | N/A      | N/A     | 1281  | 628.03  | <.0001 |
| Fixed Effect: Group * Oscillation | N/A      | N/A     | 1281  | 7.19    | <.0001 |
| Novel L6 RS Cycle 1               | -0.1812  | 0.06699 | 1040  | -2.7    | 0.007  |
| Novel L6 RS Cycle 2               | 0.1158   | 0.06699 | 1040  | 1.73    | 0.0841 |
| Novel L6 RS Cycle 3               | -0.07713 | 0.06699 | 1040  | -1.15   | 0.2499 |
| Novel L6 RS Cycle 4               | 0.04634  | 0.06699 | 1040  | 0.69    | 0.4893 |

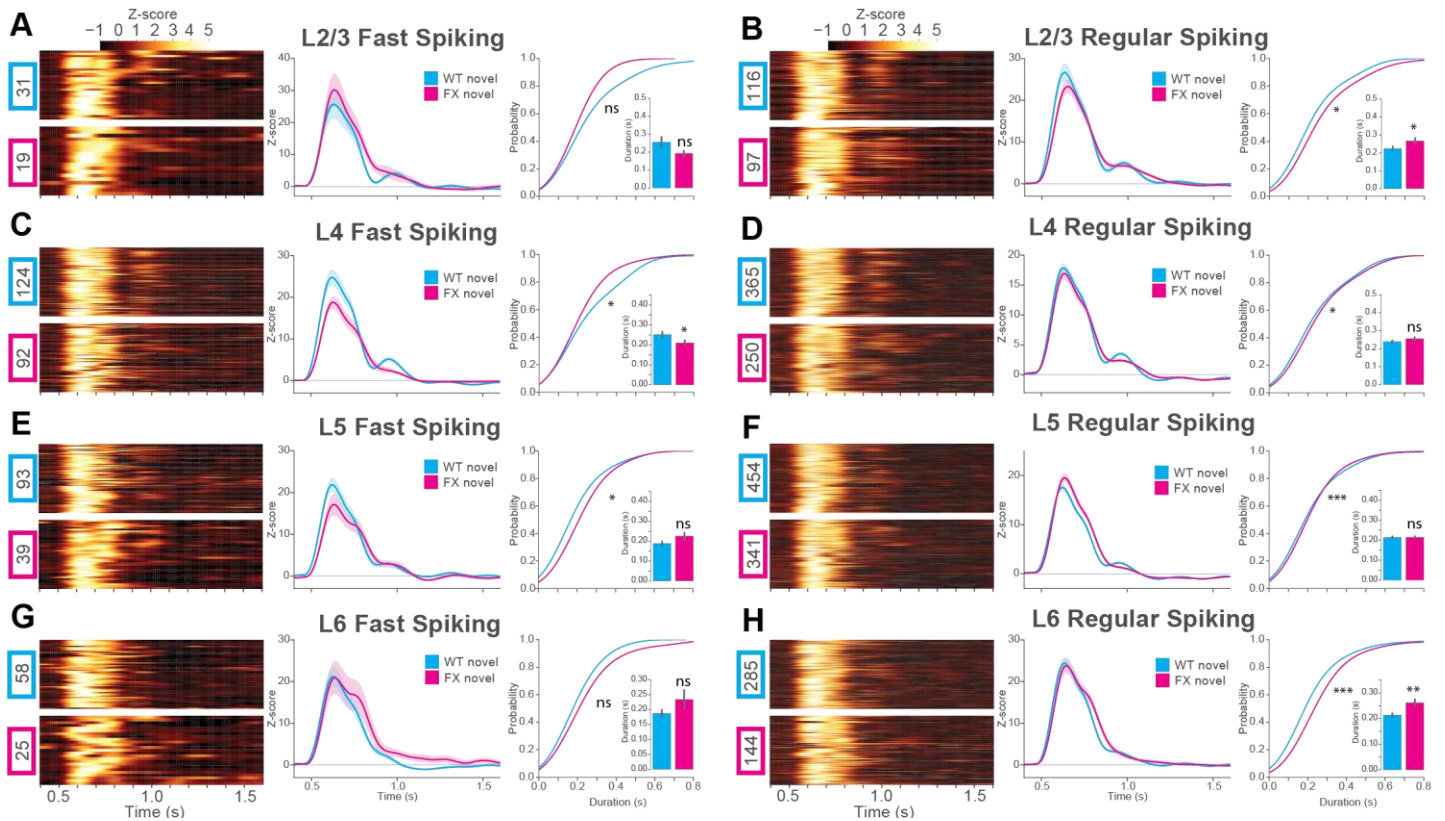

**Figure S6. Responses to novel stimuli across all cortical layers and neural subtypes in WT and FX mice. Related to Figure 2.**

Visually excited units in all layers in response to novel stimuli. WT (Cyan) 24 mice, FX (magenta) 18 mice. Z-scored firing rates are shown in the heatmaps. Population z-score line plots are shown to the right of the heatmaps. A cumulative distribution (CDF) of oscillation duration is shown to the right of the line plots, with bar graphs of the mean oscillation duration inset.

(A) L2/3 FS units: 2 sample KS test, novel WT vs FX duration:  $D(47)=0.22$ ,  $p=0.58$ . Welch's t-test of mean duration:  $t(47)=1.82$ ,  $p=0.07$  (units after peak detection: WT pre  $N=31$ , FX pre  $N=18$ ).

(B) L2/3 RS units: 2 sample KS test, novel WT vs FX duration:  $D(204)=0.20$ ,  $p=0.02$ . Welch's unequal variances t-test of mean duration:  $t(204)=-2.13$ ,  $p=0.03$  (units after peak detection: WT pre  $N=112$ , FX pre  $N=94$ ).

(C) L4 FS units: 2 sample KS test, novel WT vs FX duration:  $D(207)=0.22$ ,  $p=0.01$ . Welch's t-test of mean duration:  $t(207)=2.14$ ,  $p=0.03$  (units after peak detection: WT pre  $N=121$ , FX pre  $N=88$ ).

(D) L4 RS units: 2 sample KS test, novel WT vs FX duration:  $D(574)=0.13$ ,  $p=0.01$ . Welch's t-test of mean duration:  $t(574)=-1.28$ ,  $p=0.19$  (units after peak detection: WT pre  $N=348$ , FX pre  $N=228$ ).

(E) L5 FS units: 2 sample KS test, novel WT vs FX duration:  $D(124)=0.27$ ,  $p=0.03$ . Welch's t-test of mean duration:  $t(124)=-1.61$ ,  $p=0.11$  (units after peak detection: WT pre  $N=90$ , FX pre  $N=36$ ).

(F) L5 RS units: 2 sample KS test, novel WT vs FX duration:  $D(761)=0.16$ ,  $p=3.58E-5$ . Welch's t-test of mean duration:  $t(761)=-0.12$ ,  $p=0.89$  (units after peak detection: WT pre  $N=435$ , FX pre  $N=328$ ).

(G) L6 FS units: 2 sample KS test, novel WT vs FX duration:  $D(77)=0.21$ ,  $p=0.42$ . Welch's unequal variances t-test of mean duration:  $t(77)=-1.32$ ,  $p=0.19$  (units after peak detection: WT pre  $N=57$ , FX pre  $N=22$ ).

(H) L6 RS units: 2 sample KS test, novel WT vs FX duration:  $D(460)=0.26$ ,  $p=5.43E-6$ . Welch's unequal variances t-test of mean duration:  $t(460)=-2.96$ ,  $p=3.3E-3$  (units after peak detection: WT pre  $N=278$ , FX pre  $N=184$ ).

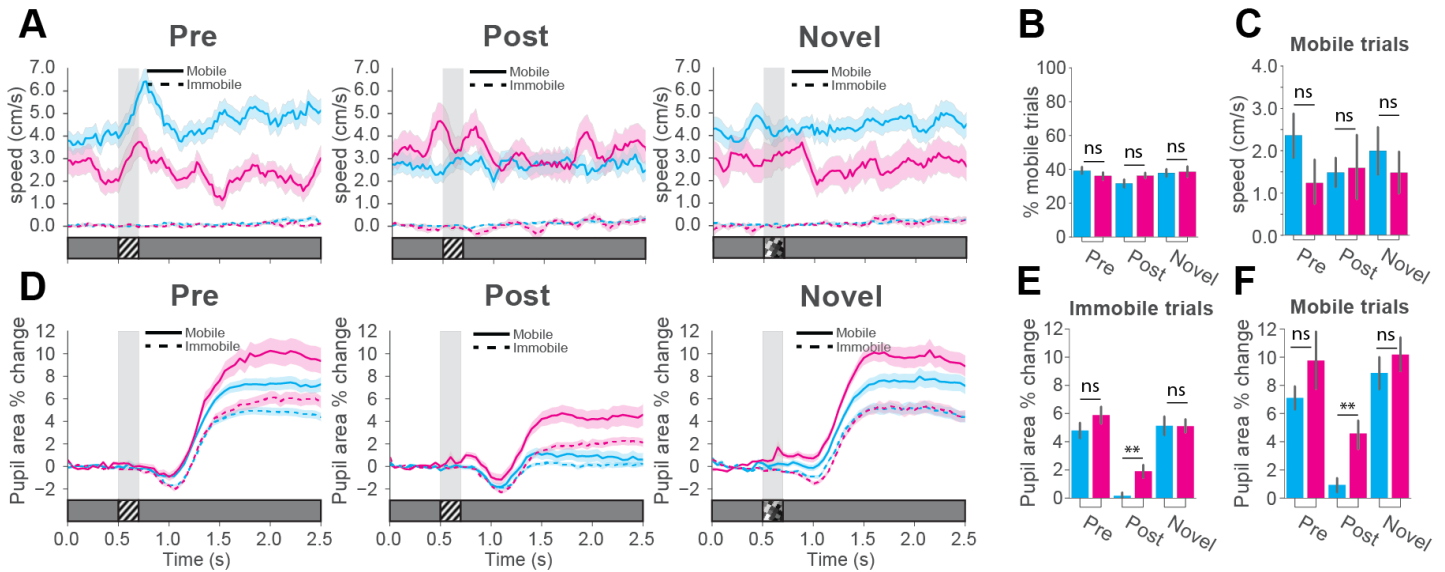

**Figure S7. Locomotion and pupillometry. Related to Figures 1 and 2.**

(A) Averaged locomotion traces for each recording condition (WT pre (cyan) = 20 mice, FX pre (magenta) = 12 mice, WT post (cyan) = 20 mice, FX post (magenta) = 12 mice, WT novel (cyan) = 20 mice, FX novel (magenta) = 11 mice). Only animals with both mobile and immobile trials are shown.

(B) Quantification of the percentage of mobile trials, averaged across mice for each stimulus condition. No significant differences could be found between WT and FX mice.

(C) Quantification of the mean speed across mice during the post stimulus response period (0.5 to 1.0 s) for mobile trials. T-test, WT pre vs FX pre:  $t(30)=1.86$ ,  $p=0.07$ . WT post vs FX post:  $t(30)=-0.26$ ,  $p=0.79$ . WT novel vs FX novel:  $t(29)=0.83$ ,  $p=0.40$ .

(D) Pupillometry recordings, averaged and presented as pupil area percent change from the baseline period. WT pre (cyan)=34 mice immobile, 22 mobile. FX pre (magenta)=23 mice immobile, 11 mobile. WT post (cyan)=33 mice immobile, 14 mice mobile. FX post (magenta) = 23 mice immobile, 11 mobile. WT novel (cyan)=23 mice immobile, 17 mobile. FX novel (magenta)=16 mice immobile, 11 mice mobile.

(E) Quantification of the sustained surprise response period (1.5 s to 2.5 s) for each recording condition during immobile trials. Welch's t-test, WT pre vs FX pre:  $t(55)=-1.27$ ,  $p=0.2$ . WT post vs FX post:  $t(54)=-3.33$ ,  $p=2.04E-3$ . WT novel vs FX novel:  $t(37)=0.02$ ,  $p=0.97$ .

(F) Quantification of the sustained surprise response period (1.5 s to 2.5 s) for each recording condition during mobile trials. Welch's t-test, WT pre vs FX pre:  $t(31)=-1.09$ ,  $p=0.29$ . WT post vs FX post:  $t(23)=-3.00$ ,  $p=9.10E-3$ . WT novel vs FX novel:  $t(26)=0.72$ ,  $p=0.47$ .

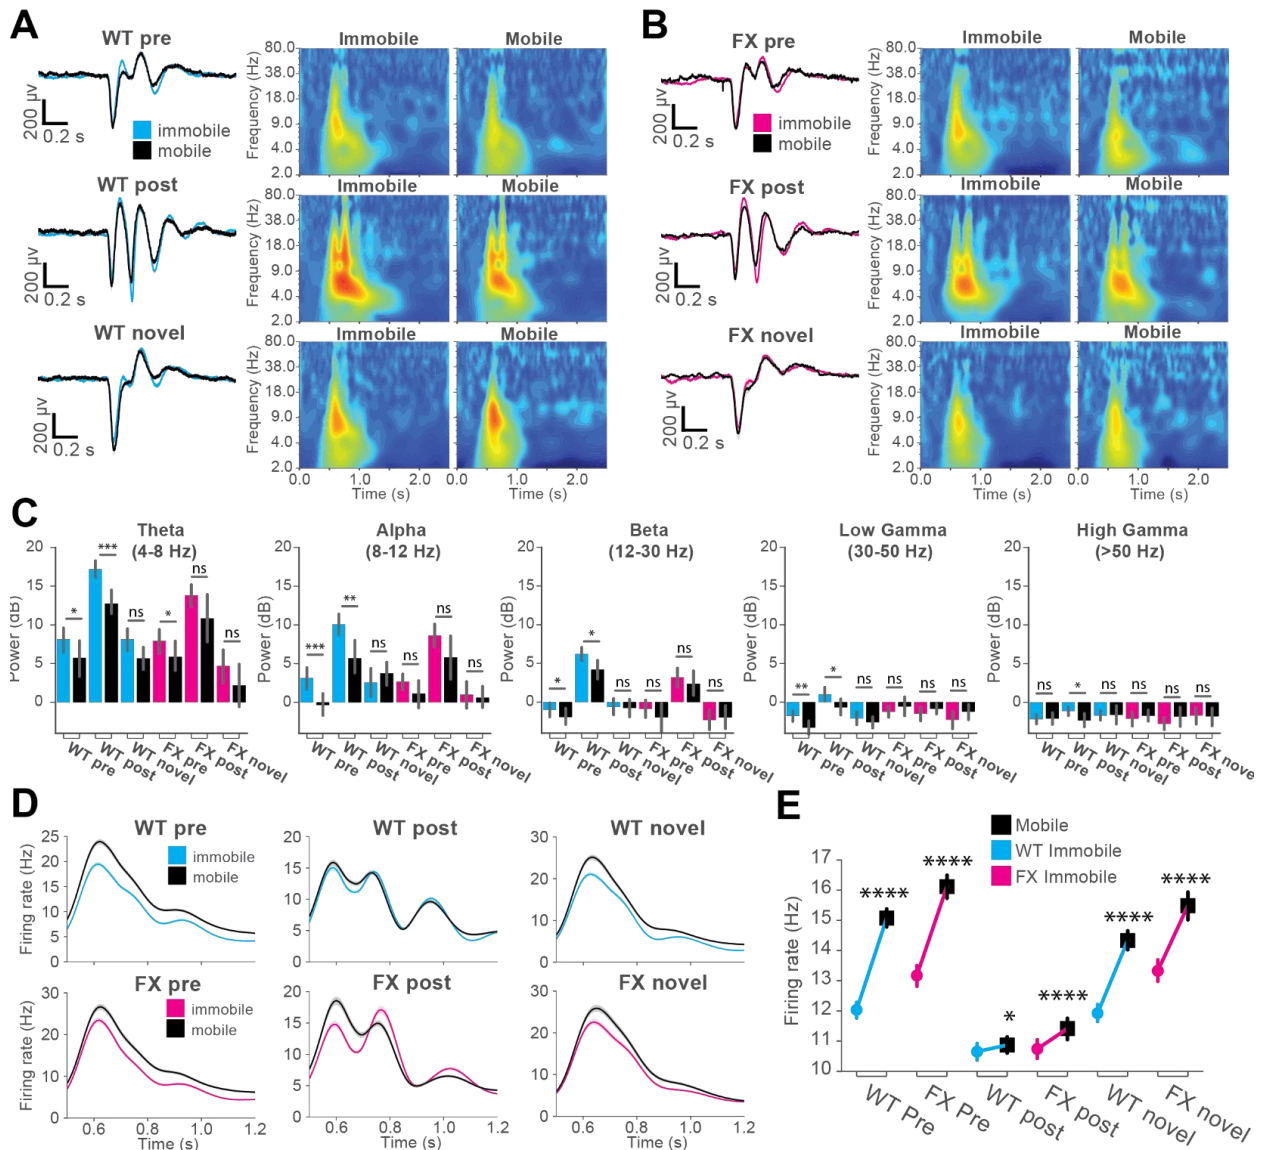

**Figure S8. Locomotion decreases the power of low frequency oscillations while increasing firing rates. Related to Figures 1 and 2.**

(A) Averaged time frequency spectrograms for WT mice during stationary trials (Cyan) or locomoting trials (black).

(B) Averaged time frequency spectrograms for FX mice during stationary trials (Magenta) or locomoting trials (black).

(C) Bar plots comparing the baseline normalized power between stationary and locomoting trials for each condition across different frequency bands. Mann-Whitney-U test, stationary vs locomoting Theta: WT pre:  $t=266$ ,  $p=0.02$ . WT post:  $t=65$ ,  $p=5.42E-5$ . WT novel:  $t=114$ ,  $p=0.02$ . FX pre:  $t=84$ ,  $p=0.01$ . FX post:  $t=154$ ,  $p=0.06$ . FX novel:  $t=78$ ,  $p=0.09$ . Alpha: WT pre:  $t=172$ ,  $p=2.37E-4$ . WT post:  $t=111$ ,  $p=2.16E-3$ . WT novel:  $t=147$ ,  $p=0.13$ . FX pre:  $t=111$ ,  $p=0.07$ . FX post:  $t=155$ ,  $p=0.06$ . FX novel:  $t=96$ ,  $p=0.27$ . Beta: WT pre:  $t=284$ ,  $p=0.04$ . WT post:  $t=136$ ,  $p=0.01$ . WT novel:  $t=183$ ,  $p=0.46$ . FX pre:  $t=126$ ,  $p=0.15$ . FX post:  $t=175$ ,  $p=0.15$ . FX novel:  $t=109$ ,  $p=0.48$ . Low Gamma: WT pre:  $t=234$ ,  $p=6.35E-3$ . WT post:  $t=143$ ,  $p=0.01$ . WT novel:  $t=160$ ,  $p=0.22$ . FX pre:  $t=127$ ,  $p=0.16$ . FX post:  $t=174$ ,  $p=0.14$ . FX novel:  $t=75$ ,  $p=0.07$ . High Gamma: WT pre:  $t=387$ ,  $p=0.49$ . WT post:  $t=143$ ,  $p=0.01$ . WT novel:  $t=184$ ,  $p=0.47$ . FX pre:  $t=158$ ,  $p=0.48$ . FX post:  $t=143$ ,  $p=0.01$ . FX novel:  $t=184$ ,  $p=0.47$ .

(D) Time courses of average firing rates from stationary or locomoting (black) trials for each condition.

(E) Mean firing rates from 0.5 to 1.0s from stationary or locomoting (black) trials for each condition. Only units with both mobile and immobile trials are compared against one another for each condition. A significant increase in firing rate is seen during locomotion for all conditions. Wilcoxon signed-rank test, WT pre, 1404 units:  $t=190957$ ,  $p=5.12E-88$ . FX pre, 813 units:  $t=66902$ ,  $p=5.37E-49$ . WT post, 724 units:  $t=120176$ ,  $p=0.04$ . FX post, 687 units:  $t=95999$ ,  $p=2.04E-5$ . WT novel, 1188 units:  $t=165849$ ,  $p=1.81E-56$ . FX novel, 757 units:  $t=67179$ ,  $p=8.32E-37$ .

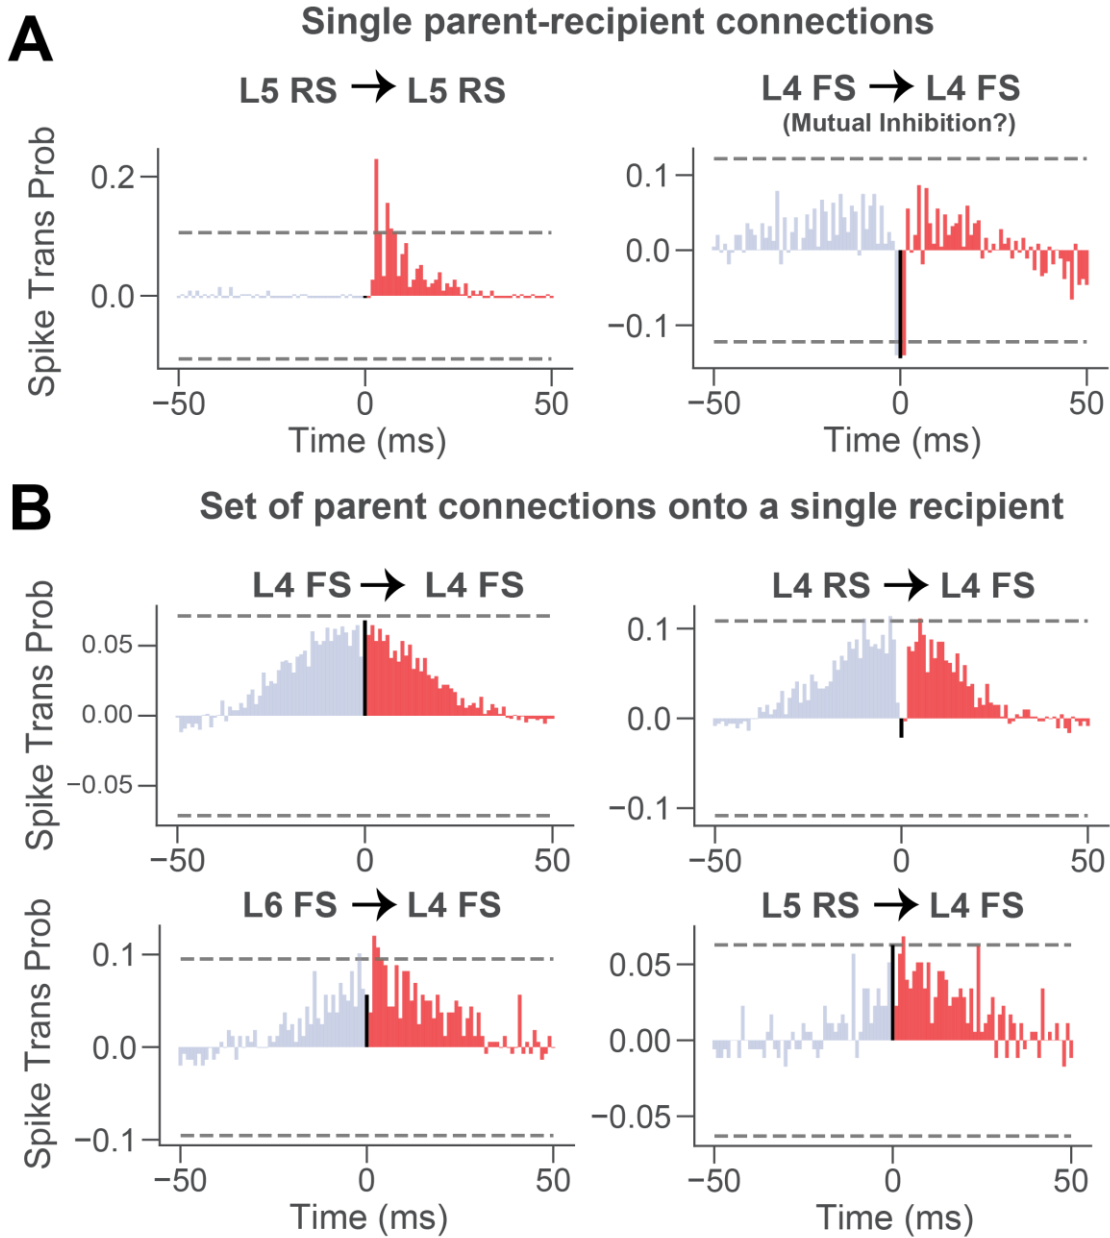

**Figure S9. Example cross correlograms of unit pairs. Related to Figure 4.**

(A) Example cross correlations of units from directed information analysis with single parent units sending information to single recipient units.

(B) Example cross correlations of units from directed information analysis where a set of 4 parents is predictive of the activity of a single recipient unit. Each correlation shown is between one of the 4 parents and the recipient unit.

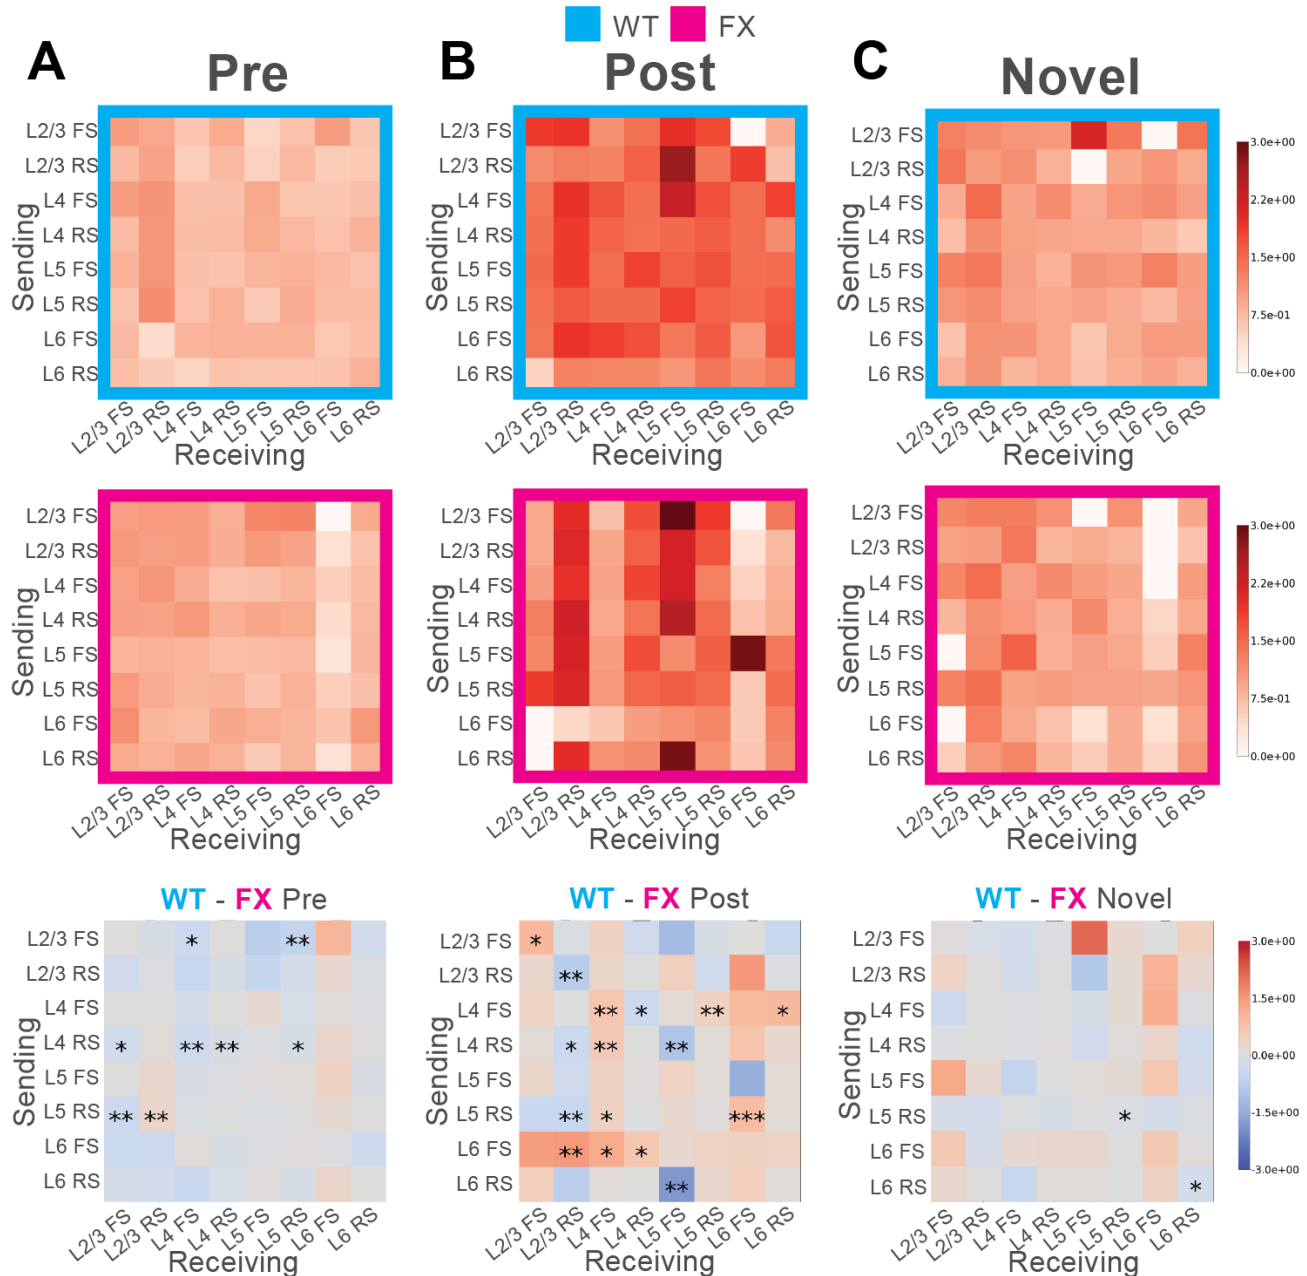

**Figure S10. Layer and cell type specific changes in functional connectivity in WT and FX mice. Related to Figure 4.**

(A) Functional connectivity (normalized directed information) pre perceptual experience for WT (Cyan) and FX (Magenta) mice, where a Markov order of 30 ms was used to compute directed information values. Darker colors indicate stronger (more predictive) connections. The vertical axis indicates cells in different layers sending information, while the horizontal axis indicates cells receiving that information. Bottom: difference between the WT and FX heatmaps. Monte Carlo simulations (10E6 runs) were used to approximate the permutation test for each square in each difference matrix above. Significance levels: '\*' for  $p < 0.1$  and '\*\*' for  $p < 0.05$  '\*\*\*' for  $p < 0.01$ .

(B) Functional connectivity post perceptual experience.

(C) Functional connectivity in response to novel stimuli.

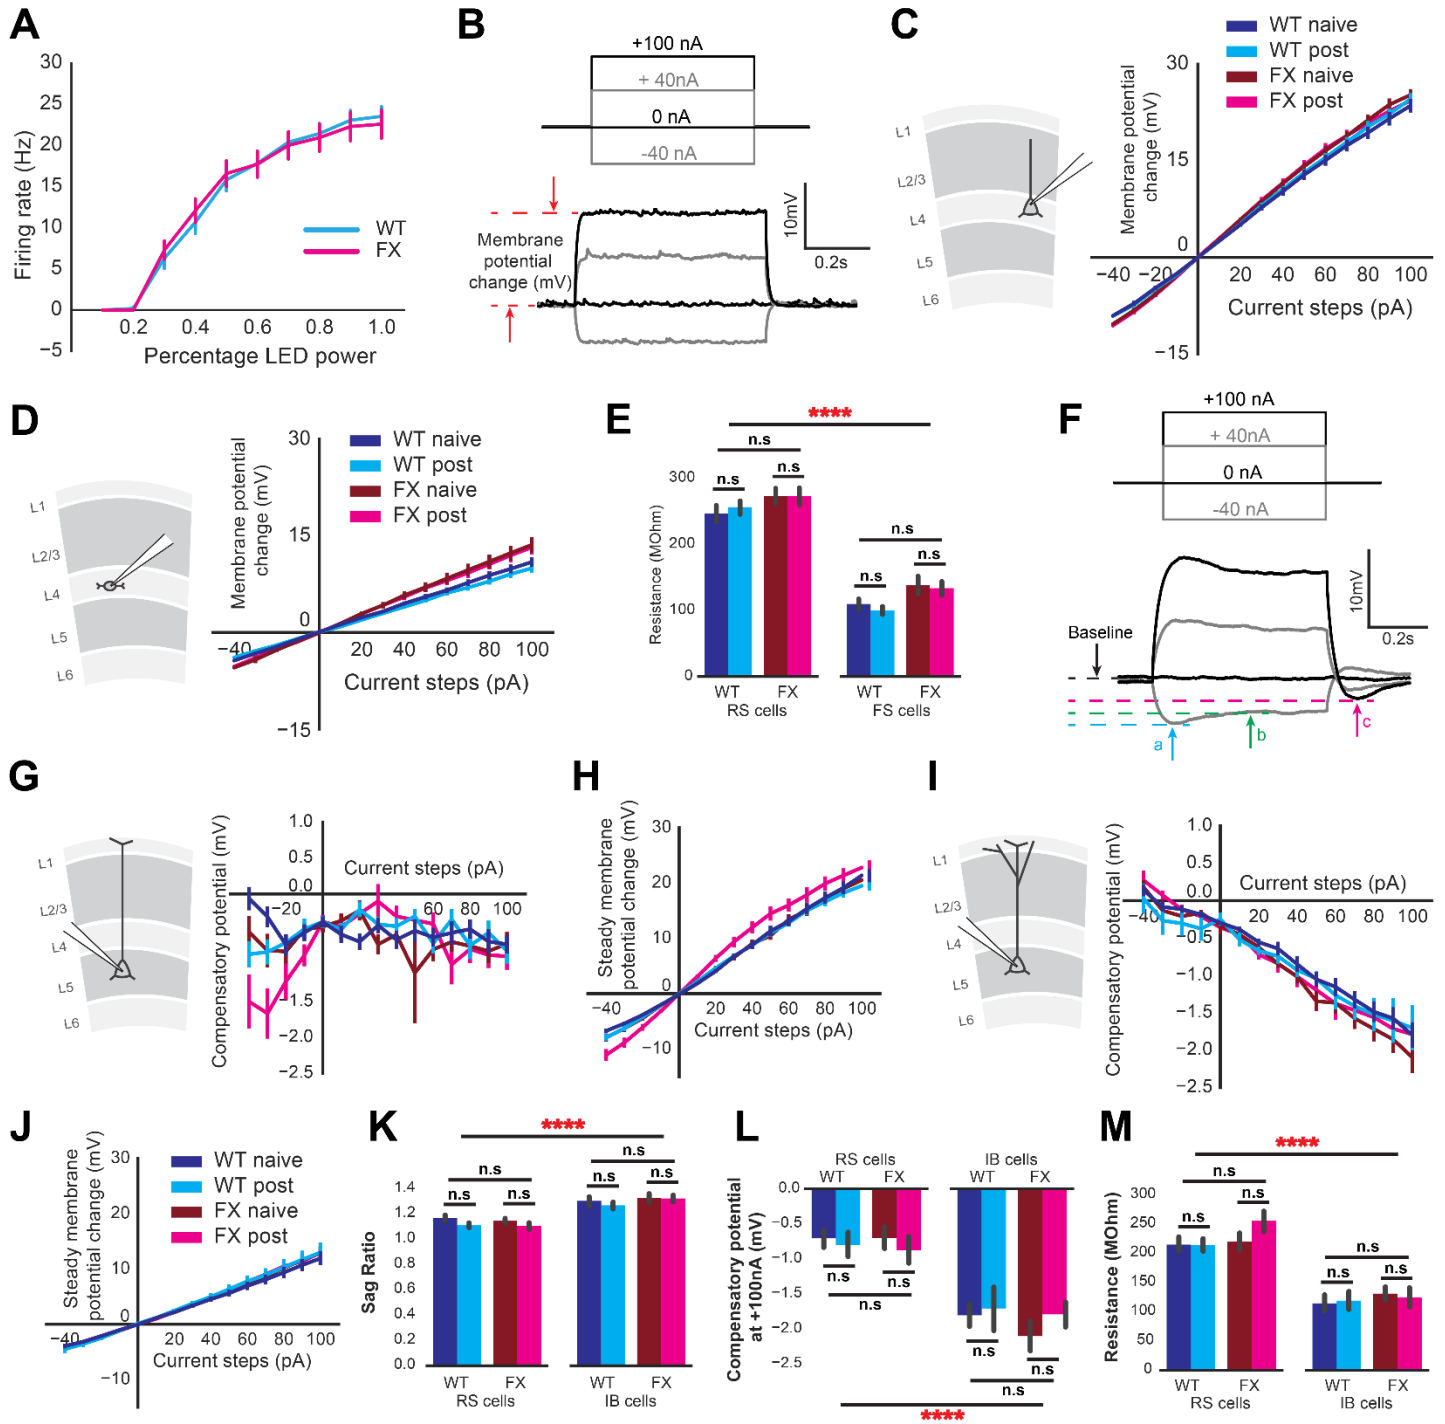

**Figure S11. Characterizing layer 5 (L5) patched cell types. Related to Figures 5 and 6.**

(A) ChR2-YFP positive L5 neurons in V1 were held under current clamp while full-field LED illumination was applied to measure the action potential frequency. N = 3 animals/21 neurons for WT and 4 animals/28 neurons for FX. Data reported in the curve are mean  $\pm$  standard error of mean.

(B) Step current injection illustration and representative current-clamp traces from a layer 4 fast-spiking (FS) interneuron.

(C) Averaged current-voltage curve from L4 RS neurons showing the membrane potential change (demonstrated in A) at each current injection step.

- (D) Averaged current-voltage curve from L4 FS interneurons showing the membrane potential change (demonstrated in A) at each current injection step.
- (E) Mean input resistance for each group. Data reported in bar graphs are mean  $\pm$  standard error of mean. Statistical significance on means was reported from three-way ANOVA followed by Tukey's HSD tests.
- (F) Representative current-clamp traces from a layer 5 intrinsically-bursting (IB) neuron.
- (G) Averaged compensatory current-voltage curve from L5 RS neurons showing the absence of rebound potential at the offset of step current injection.
- (H) Averaged steady phase current-voltage curve from L5 RS neurons. The slope of the curves represents input resistance.
- (I) Averaged compensatory current-voltage curve from L5 IB neurons showing the presence of rebound potential at the offset of step current injection (demonstrated in b).
- (J) Averaged steady phase current-voltage curve from L5 IB neurons. The slope of the curves represents input resistance.
- (K) Mean sag ratio (defined in B) for each group.
- (L) Mean hyperpolarizing compensatory potential at the offset of +100nA current injection for each group.
- (M) Mean input resistance for each group. Data reported in bar graph are mean  $\pm$  standard error of mean. Statistical test on means was three-way ANOVA followed by multiple comparison test using Tukey's honest significant difference criterion.
